# Supplementary material for: CdS nanodroplets over silica microballs for efficient room-temperature LPG detection
Source: Royal Society of Chemistry journal article supplement (doi:10.1039/c9na00053d), 2019-01-01
Supplement: c9na00053d1.pdf [file c9na00053d1.pdf]

## CdS nanodroplets over silica micro balls for efficient room temperature LPG detection

Nupur Saxena<sup>1\*</sup>, Pragati Kumar<sup>2#</sup>, and Vinay Gupta<sup>3</sup>

<sup>1</sup>Department of Physics & Astronomical Sciences, Central University of Jammu, Rahya-Suchani (Bagla), Samba, 181 143 Jammu, J&K, India

<sup>2</sup>Department of Nano Sciences and Materials, Central University of Jammu, Rahya-Suchani (Bagla), Samba, 181 143 Jammu, J&K, India

<sup>3</sup>Department of Physics & Astrophysics, University of Delhi, Delhi-110 007, India

E-mail: \* [nsaxena@gmail.com](mailto:nsaxena@gmail.com), # [pkumar.phy@gmail.com](mailto:pkumar.phy@gmail.com)

### Supplementary Material

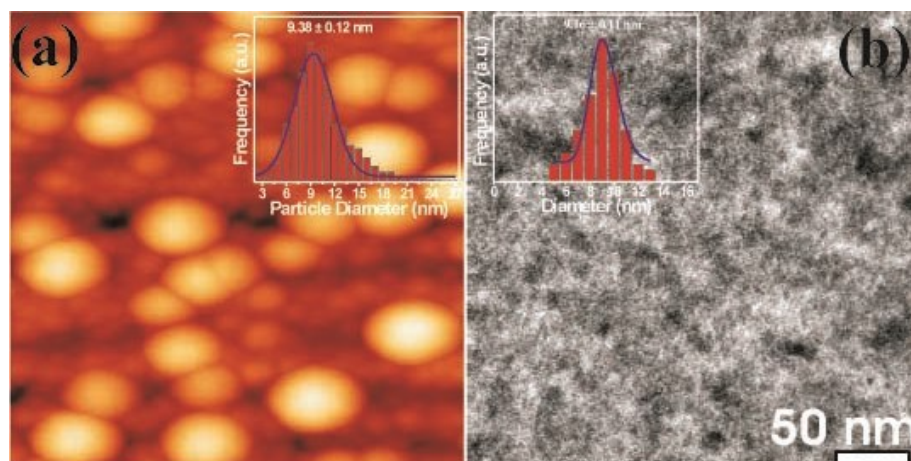

Fig. S1 (a) AFM micrograph at a 0.5 mm\*0.5 mm scale and (b) TEM image of nc-CdS film (Insets: corresponding particle size distribution histograms).

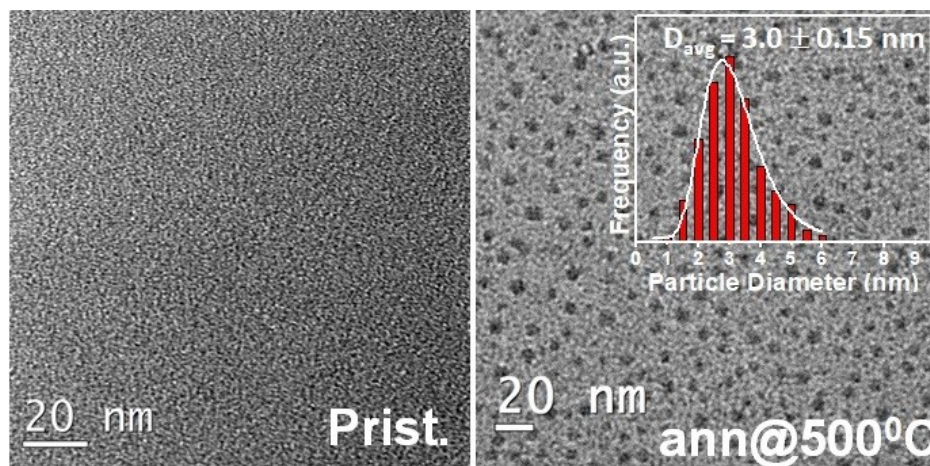

Fig. S2. TEM images of CdS:SiO<sub>2</sub> nanocomposite thin films.

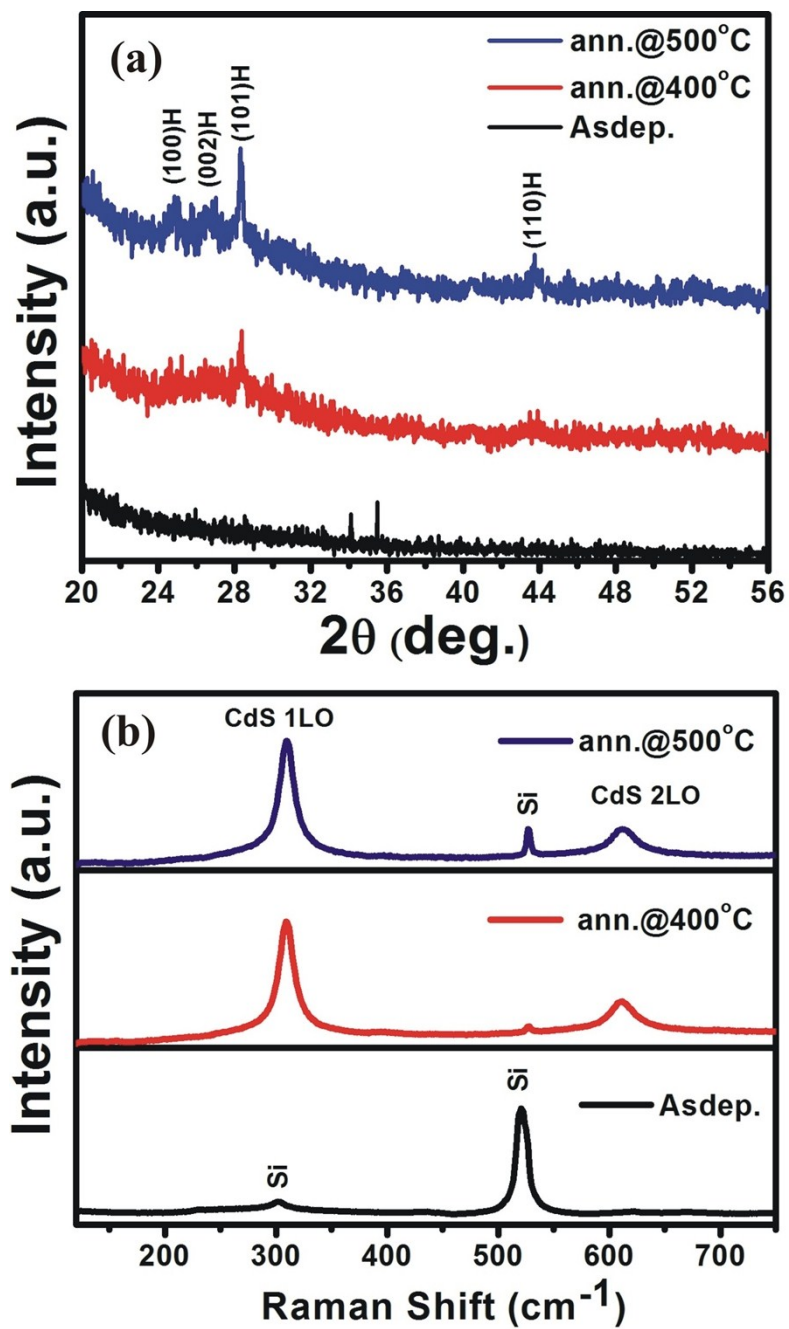

Fig. S3. (a) GAXRD and (b) micro Raman spectra of pristine and annealed CdS:SiO<sub>2</sub> nanocomposite thin films.

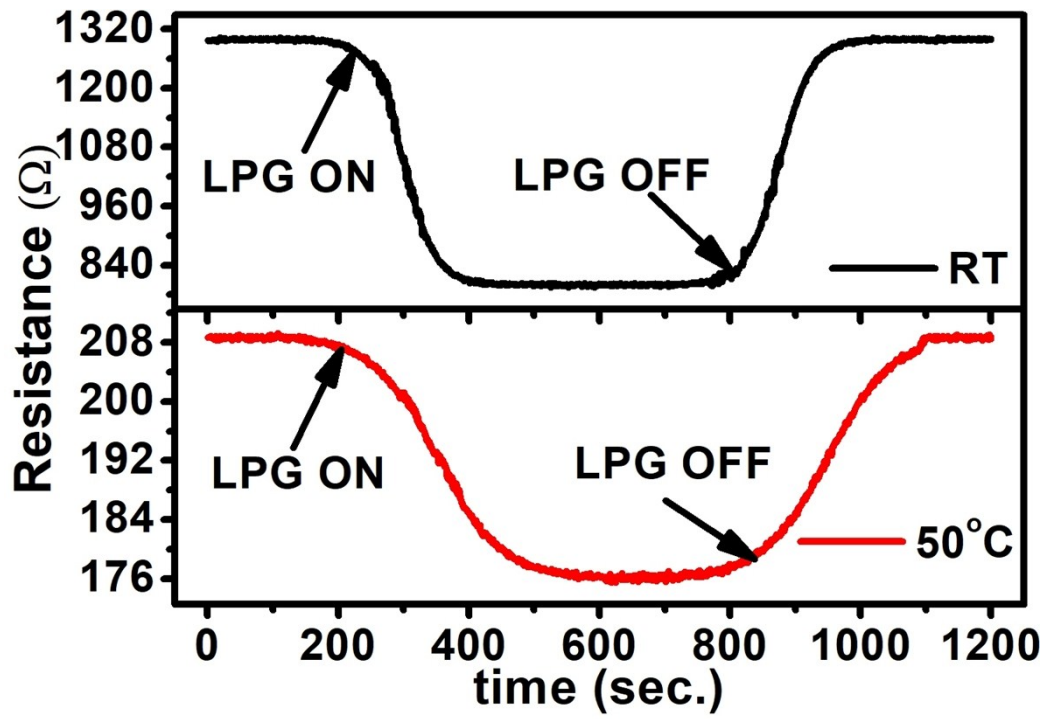

Fig. S4. Dynamic study of nc-CdS thin film.
